# Supplementary material
Source: PubMed Central journal article supplement (PMC7953203)

## Supplementary Online Content

Yang P, Chiang PW, Weleber RG, Pennesi ME. Autosomal dominant retinal dystrophy with electronegative waveform associated with a novel *RAX2* mutation. *JAMA Ophthalmol*. Published online March 19, 2015. doi:10.1001/jamaophthalmol.2015.0357.

**eFigure 1.** Electroretinogram Component Overlay of Patients IV-4, III-12, and III-5

**eFigure 2.** Fundus Autofluorescence of Patients III-12 and III-5

**eFigure 3.** Multifocal Electroretinogram of Patient III-5

This supplementary material has been provided by the authors to give readers additional information about their work.

## **eFigure Legends**

### **eFigure 1: Electroretinogram Component Overlay of Patients IV-4, III-12, and III-5**

Patient III-4's component overlay was not available. OD, right eye. OS, left eye.  $\mu\text{V}$ , microvolts. ms, milliseconds.

### **eFigure 2: Fundus Autofluorescence of Patients III-12 and III-5**

y/o, years old.

### **eFigure 3: Multifocal Electroretinogram of Patient III-5**

OD, right eye. OS, left eye. nV, nanovolts. ms, milliseconds.

# IV-4

## Scotopic Single Flash

Dim White  
Bright White

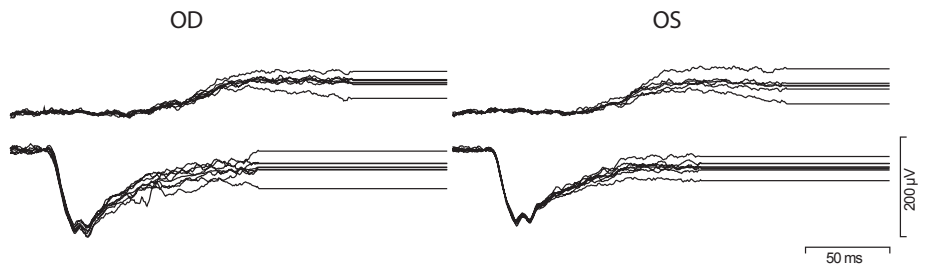

## Photopic Single Flash

Bright White

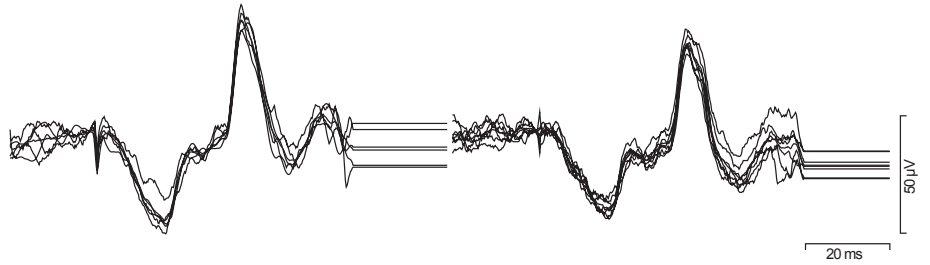

# III-12

## Scotopic Single Flash

Dim White  
Bright White

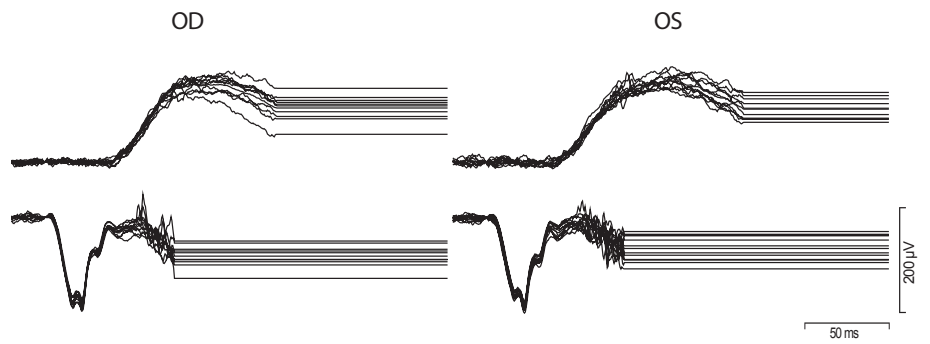

## Photopic Single Flash

Bright White

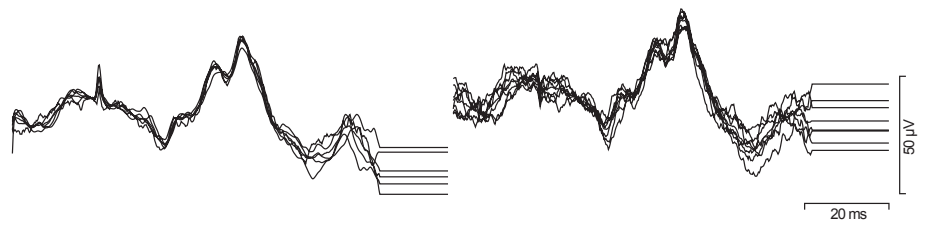

# III-5

## Scotopic Single Flash

Dim White  
Bright White

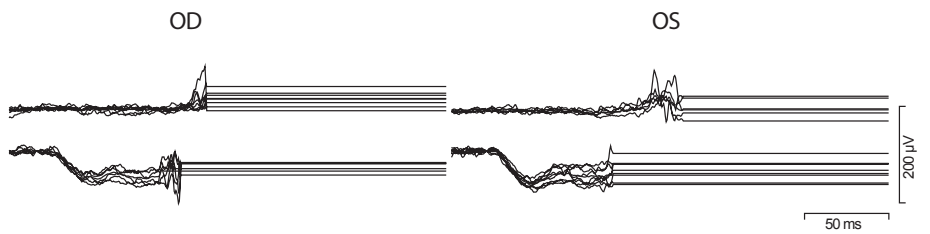

## Photopic Single Flash

Bright White

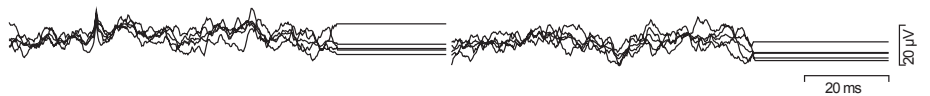

III-12 (54 y/o)

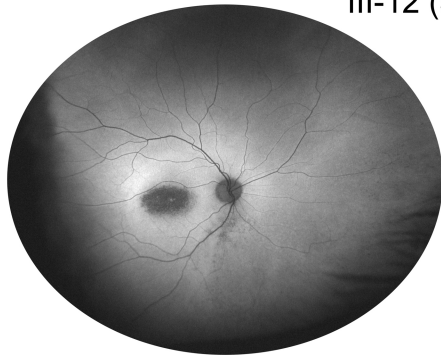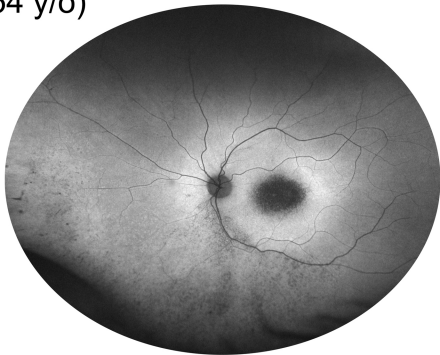

III-5 (69 y/o)

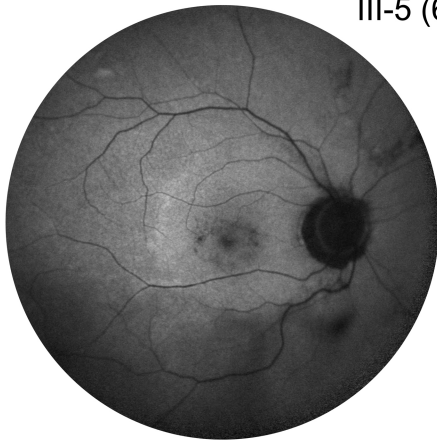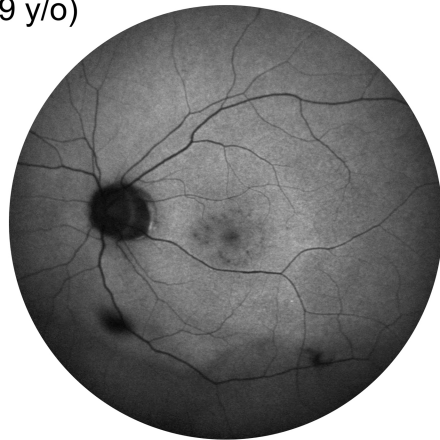

# III-5

## First Order Summary - OD

### Traces

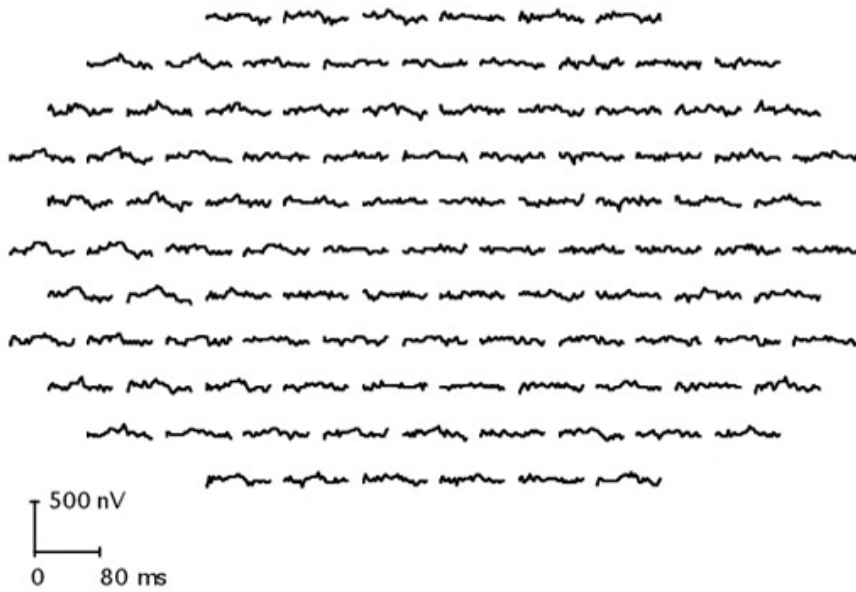

### Amplitude Density

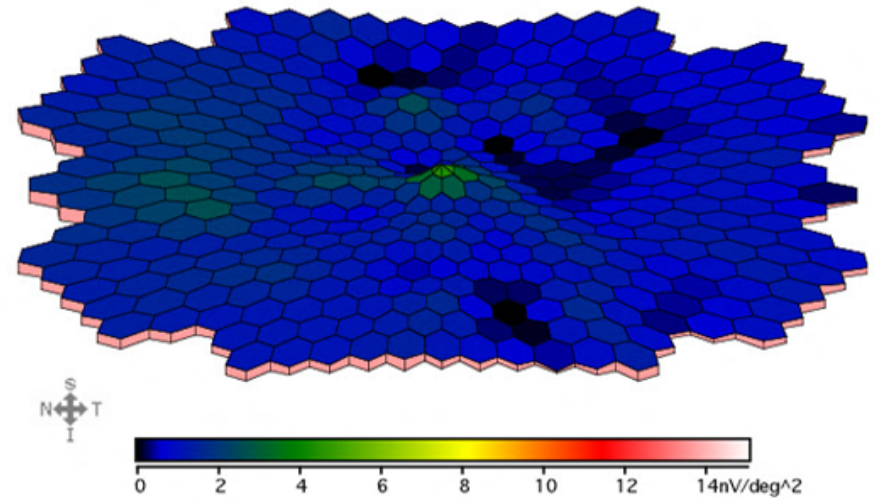

## First Order Summary - OS

### Traces

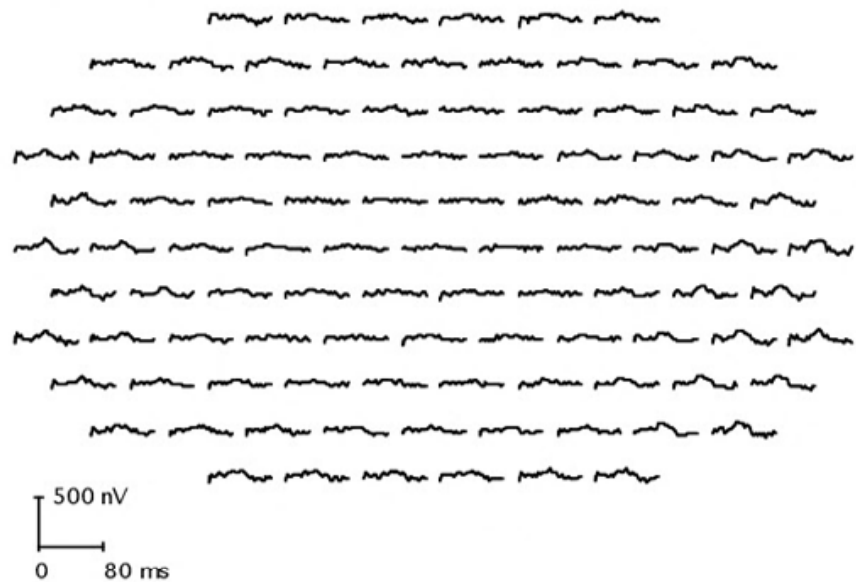

### Amplitude Density

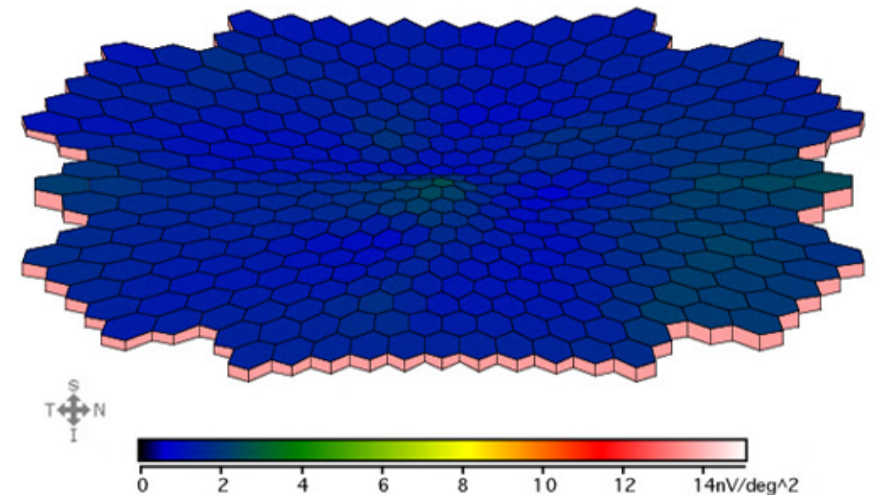

Supplement: NIHMS1674214-supplement-supplement.pdf [file NIHMS1674214-supplement-supplement.pdf]
